# Supplementary material
Source: HighWire-hosted journal article supplement (http://thorax.bmj.com/highwire/filestream/173900/field_highwire_adjunct_files/1/6410857Table2.docx)
Supplement: 6410857Table2.docx [file 6410857Table2.docx]

Table 2 (supplement): Correlation of random blood glucose with significant variables following univariate analysis in NIV successful outcomes (n=72)

| Variable | Correlation coefficient* | P value |
| --- | --- | --- |
| Age (years)  Respiratory Rate (breaths per minute)  APACHE **II** index  Pre-NIV pH  Serum Bicarbonate (mmol/l) | -0.04  0.29  0.04  -0.21  -0.16 | 0.71 (NS)  0.01  0.73 (NS)  0.07  0.18 (NS) |

*Spearmans Rank Correlation
